# Supplementary material
Source: Springer Nature journal article supplement (https://www.springermedizin.de/resource/supplementary/12936_2009_891_MOESM12_ESM.pdf/9548478)

### Jungle

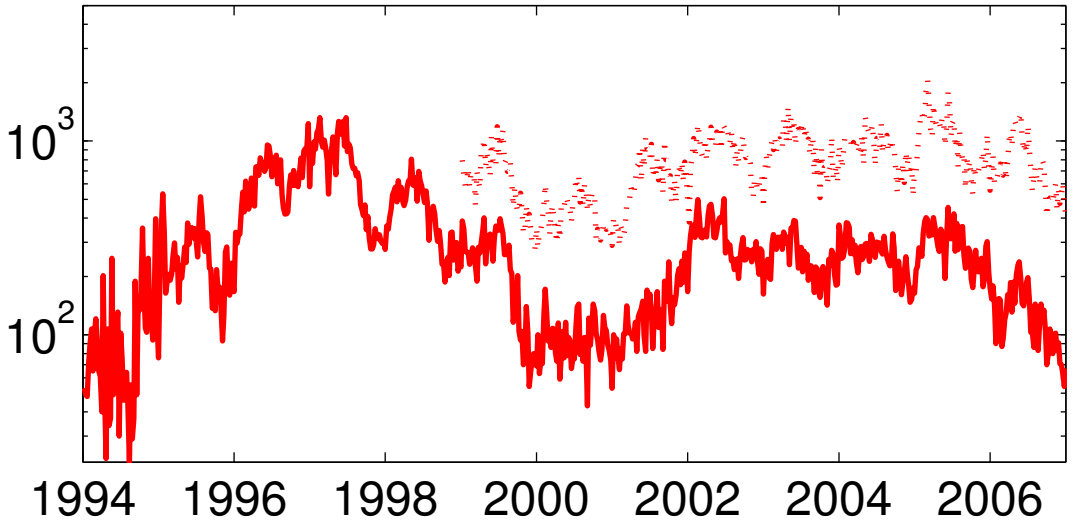

### Mountain

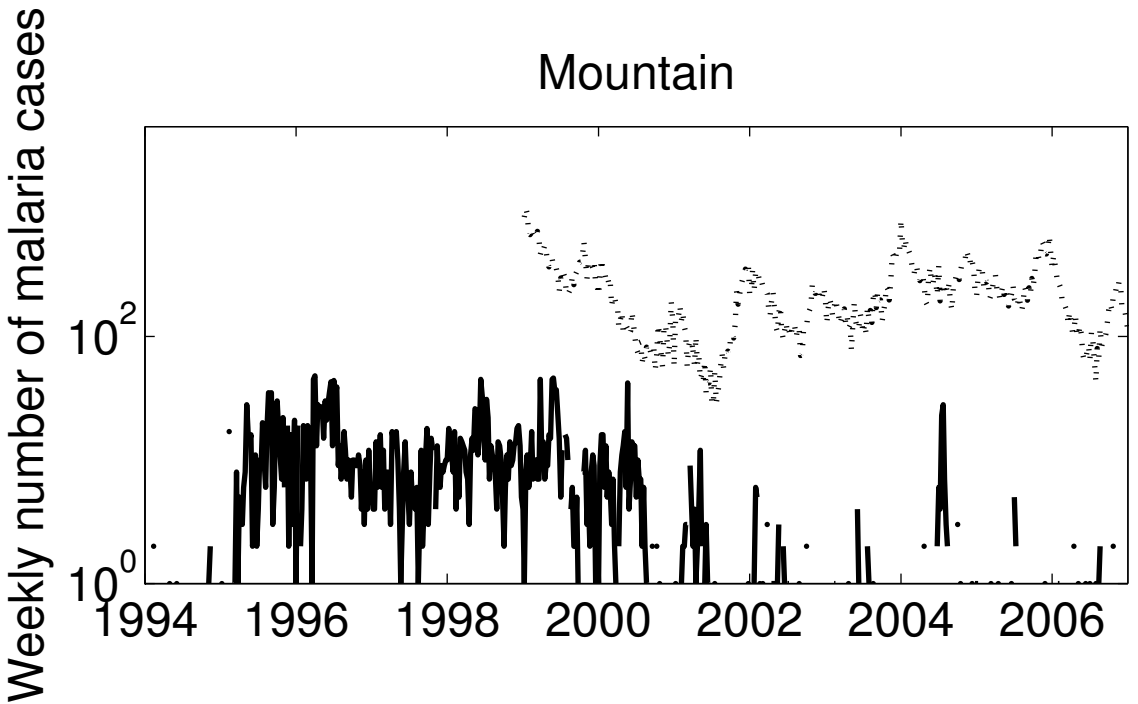

### Coast

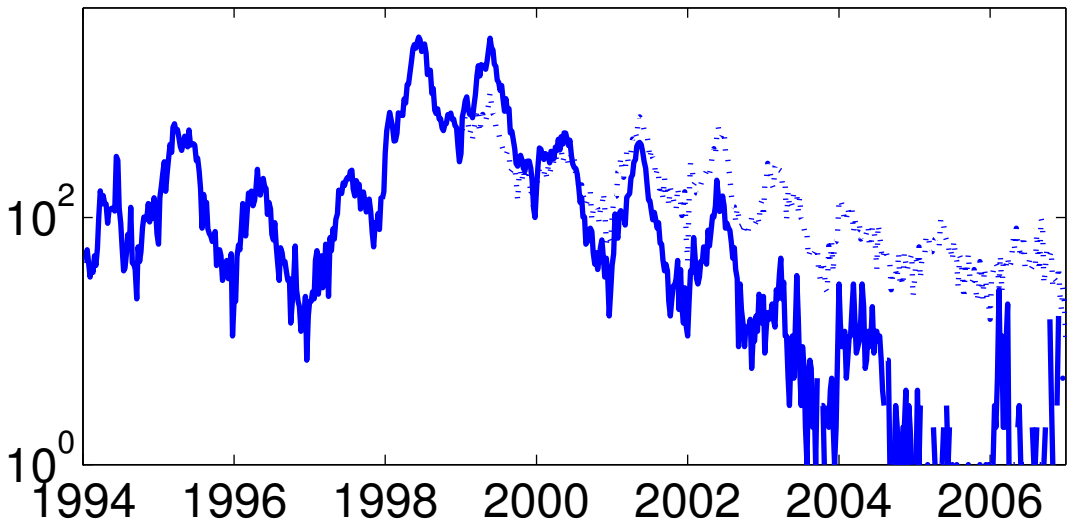

Supplement: MOESM12 [file 9548478]
